# Supplementary material
Source: PubMed Central journal article supplement (PMC2526693)
Supplement: E08-03-0237_1.pdf [file E08-03-0237_1.pdf]

**Supplementary Figure 1: Effect of the Rho-GEF domain of obscurin on immunoblotting of titin epitopes.** To test for epitope masking of the N-terminal Ig domains of titin by the Rho-GEF domain of obscurin, we blotted 500ng of a fusion construct containing the Ig I and II domains of titin (the same fusion construct used to generate our antibodies to titin at the Z-disk) and overlaid with either GST or GST fused to the Rho-GEF domain (1 $\mu$ g/ $\mu$ l) of obscurin. Binding of MBP-TitinZIGI/II to GST-Rho-GEF occurs under these conditions (see Figure 9K). We then probed the blot with the antibody used for immunofluorescence. The results show that the Rho-GEF domain of obscurin does not block binding of the antibody to the N-terminal epitopes of titin.

# Supplementary Figure 1

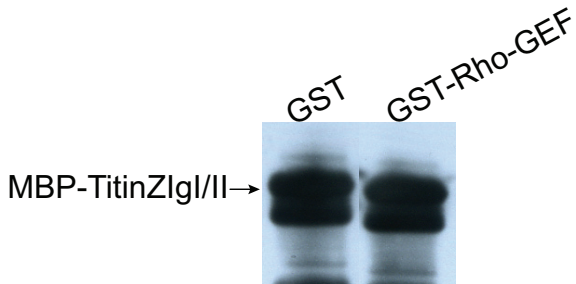

# Supplementary Table 1

|                            |                                  |
|----------------------------|----------------------------------|
| A: Rho-GEF/PH RT           | GCCACAGATCTGCTTCACCCA            |
| B: Rho-GEF/PH Rev pGBKT7   | GACGGATCCCTAGCCACGATCTGCTTCAC    |
| C: Rho-GEF/PH For pGBKT7   | AGTGAATTCGTCATCCAGGAGTTGCTGAGTTC |
| D: PH For pGBKT7           | AGTGAATTCCTATCCGCCAGGGTCAC       |
| E: Rho-GEF Rev pGBKT7      | ATCGGATCCCTAGCGCTGTGGCAGGGCAGA   |
| F: RanBP9 108 For pGADT7   | ACTTCCCGGGTCTTGCAGCGGGCCCCGGC    |
| G: RanBP9 317 For pGADT7   | TCCACCCGGGTGGGCTTCAAACACCAGGA    |
| H: RanBP9 523 For pGADT7   | TCCACCCGGGTCATCAATCATATTGCCAT    |
| I: RanBP9 211 For pGADT7   | TCCACCCGGGTGCCTGTGGGATTTATTAT    |
| J: RanBP9 421 For pGADT7   | TCCACCCGGGTGAAGCCATTGAAACAACA    |
| K: RanBP9 729 Rev pGADT7   | GCAGCTCGAGCTAATGTAGGTAGTCTTC     |
| L: RanBP9 316 Rev pGADT7   | GCAGCTCGAGCACAGTAGGATACAAATT     |
| M: RanBP9 522 Rev pGADT7   | GCAGCTCGAGTGCTTTATTTGATATTAC     |
| N: RanBP9 420 Rev pGADT7   | GCAGCTCGAGTCCCATTCTTCTGGTAA      |
| O: RanBP9 623 Rev pGADT7   | GCAGCTCGAGAAAGTGGATCATTCTTTC     |
| P: RanBP10 For pGADT7      | ATGAATTCATGGCGGCAGCGACG          |
| Q: RanBP10 Rev pGADT7      | TATCTCGAGCTAGTGCAAGTAGTC         |
| R: RanBP9 108 For pRSETC   | CGACCTCGAGCTCTTGCAGCGGGCCCC      |
| S: RanBP9 729 Rev pRSETC   | GATCAAGCTTCTACTAATGTAGGTAGTC     |
| T: RanBP9 108 For pMAL-c2x | ATCGCTAGCCTTGCAGCGGGCCCC         |
| U: RanBP9 729 Rev pMAL-c2x | GATAAGCTTCTAATGTAGGTAGTC         |
| V: RanBP9 108 For pGEX4T-1 | AGCCCGGGTCTTGCAGCGGGCCCC         |
| W: RanBP9 729 Rev pGEX4T-1 | GTGCGGCCGCCTAATGTAGGTAGTC        |
| X: RanBP9 108 For HcRed    | ATCTCGAGCTCTTGCAGCGGGCCCC        |
| Y: RanBP9 729 Rev HcRed    | CGCGAAGCTTCTAATGTAGGTAGTC        |

All primers are listed 5' and 3'. For each indicated plasmid, the forward (For) and reverse (Rev) primers were used under standard conditions for the creation of plasmids.
